# Supplementary material for: Cascade fractionation of birch into xylose, glucan oligomers, and noncondensed lignin improved using microwave assistance and molten salt hydrates
Source: Royal Society of Chemistry journal article supplement (doi:10.1039/d3gc02628k), 2023-01-01
Supplement: d3gc02628k1.pdf [file d3gc02628k1.pdf]

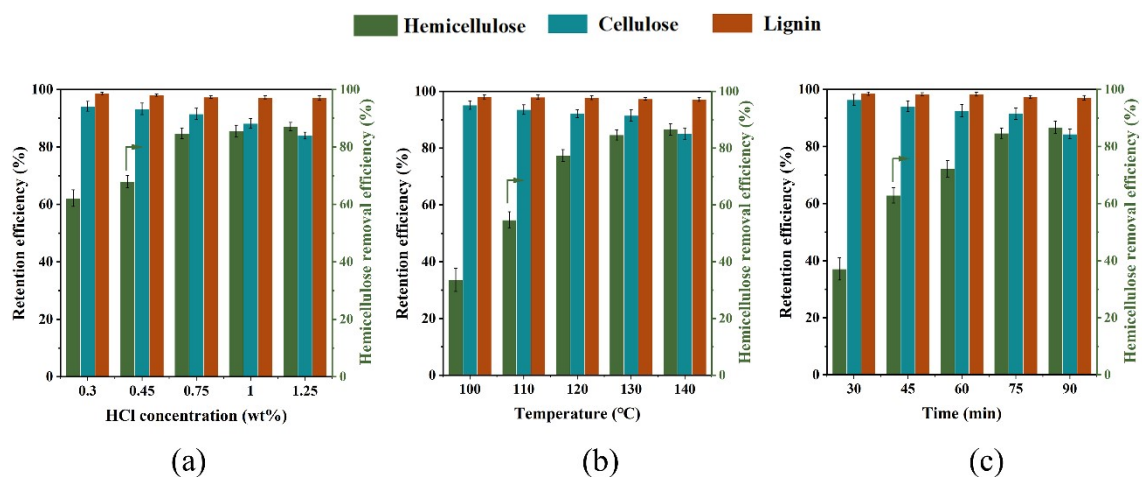

**Fig.S1** The fractionation efficiency obtained from the conventional heating hydrolysis of hemicellulose (a) different HCl concentrations (130 °C, 75 min); (b) different temperatures (0.75 wt% HCl, 75 min); (c) different times (0.75 wt% HCl, 130 °C). The left axis was the retention efficiency of cellulose and lignin, and the right axis was the hemicellulose removal efficiency.
